# Supplementary material for: Endosomal dysfunction in iPSC-derived neural cells from Parkinson’s disease patients with VPS35 D620N
Source: PubMed Central journal article supplement (PMC7542911; doi:10.1186/s13041-020-00675-5), 2020-10-08

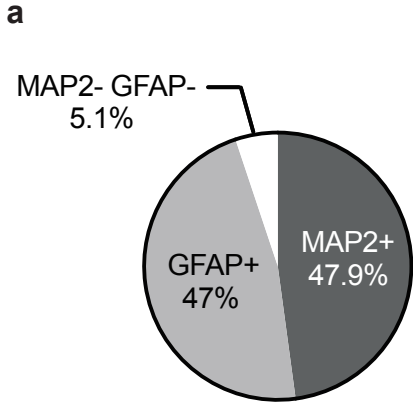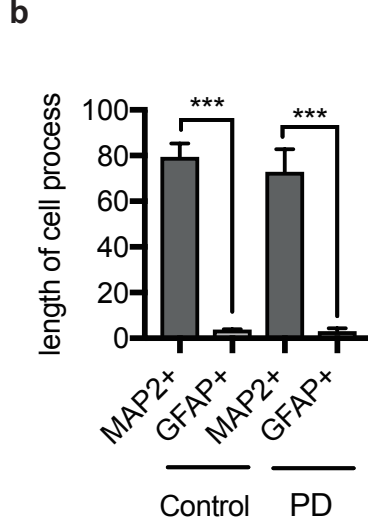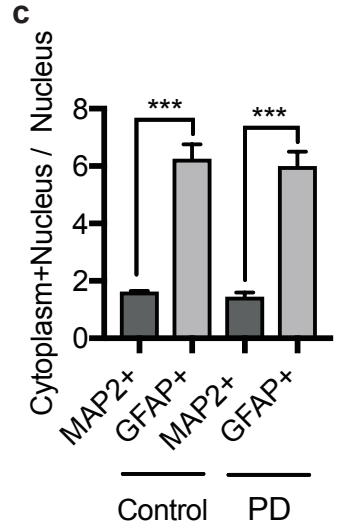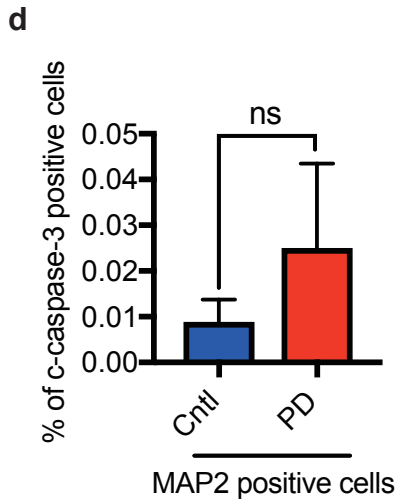

Supplement: 13041_2020_675_MOESM3_ESM.pdf [file 13041_2020_675_MOESM3_ESM.pdf]
